# Supplementary material for: Health related quality of life among Rheumatic Fever and Rheumatic Heart Disease patients in India
Source: PLoS One. 2021 Oct 29;16(10):e0259340. doi: 10.1371/journal.pone.0259340 (PMC8555809; doi:10.1371/journal.pone.0259340)
Supplement: S1 Datasheet — (XLSX) [file pone.0259340.s001.xlsx]

## Sheet: Information sheet
	Information: Sheet 1 contains data on socio-demographic characteristics of RF/RHD patients along with their utility scores (using EQ-5D-5L tool)
	Data given in sheet 1 corresponds to Table 1, 2 and 3
	Sociodemographic variables	Categories	Codes used
	Age	Upto 15 years	1
		15-30 years	2
		30-45 years	3
		45-60 years	4
		More than 60 years	5
	Gender	Male	1
		Female	2
	Religion	Hindu	1
		Sikh	2
		Muslim	3
	Locality	Urban	1
		Rural	2
		Slum	3
	Education_Initial categories	Illiterate	1
		Primary	2
		Middle	3
		Matric	4
		Senior secondary	5
		Graduate	6
		Post graduate	7
	Education_Combined categories	Illiterate	1
		Primary & Middle	2
		Matric and Senior secondary	3
		Graduate and Postgraduate	4
	Marital status	Unmarried	1
		Married	2
		Widow	3
	Occupation	Cultivator	1
		Agricultural wage labourer	2
		Non-agricultural wage labourer	3
		Own account worker	4
		Employer	5
		Unpaid family worker	6
		Regular salaried	7
		Unemployed	8
		Retired/Pensioneer	9
		Not able to work due to disability	10
		Too old to work	11
		Others	12
	Occupation_Combined categories	Unemployed (comprises of categories-6,8,10,11)	0
		Employed (comprises of categories-1,2,3,4,5,7,9,12)	1
	Annual household income	Less than 50000	1
		50k-1lac	2
		1lac-2lac	3
		More than 2 lacs	4
	Clinical severity	Rheumatic Fever (RF)	1
		Rheumatic Heart Disease (RHD)	2
		RHD with Congestive Heart Failure (CHF)	3
	EQ-5D-5L domains
	Mobility	1	No problems in walking about
		2	Slight problems in walking about
		3	Moderate problems in walking about
		4	Severe problems in walking about
		5	Unable to walk about
	Self-care	1	No problems washing or dressing
		2	Slight problems washing or dressing
		3	Moderate problems washing or dressing
		4	Severe problems washing or dressing
		5	Unable to wash or dress
	Usual activities	1	No problems doing usual activities
		2	Slight problems doing usual activities
		3	Moderate problems doing usual activities
		4	Severe problems doing usual activities
		5	Unable to do usual activities
	Pain/discomfort	1	Severe pain/discomfort
		2	Extreme pain/discomfort
		3	Moderate pain/discomfort
		4	Slight pain/discomfort
		5	No pain/discomfort
	Anxiety/depression	1	Not anxious or depressed
		2	Slightly anxious or depressed
		3	Moderately anxious or depressed
		4	Severely anxious or depressed
		5	Extremely anxious or depressed

## Sheet: Datasheet
Age in completed years	Age Bucket List	Sex	Marital Status	Religion	Locality	Educational status	Occupation	Gross Monthly Income Patient	Total family income Rs	Annual household income	Total number of family members	Total members aged Above 10 years	Total members aged Below 10 years	Clinical severity	Mobility	Self-care	Usual Activities	Pain/Discomfort	Anxiety/Depression	Clubbed value	Eq5d score	VAS score	TTO score
24	16-30	2	2	1	2	4	7	4200	10200	122400	3	2	0	2	2	1	2	2	1	21221	0.594858	100	0.8
55	46-59	2	2	3	1	7	6	0	20000	240000	5	5	0	2	1	1	1	1	1	11111	1	100	0.8
19	16-30	1	1	1	2	5	6	0	20000	240000	6	6	0	1	1	1	1	1	1	11111	1	90	0.9
26	16-30	2	2	2	2	2	6	0	6000	72000	8	2	2	1	1	1	1	1	1	11111	1	100	0.9
15	0-15	1	1	2	2	4	6	0	6000	72000	4	4	0	1	1	1	1	2	1	11121	0.78049	95	0.5
17	16-30	1	1	2	2	5	6	0	8000	96000	3	3	0	1	1	1	1	1	1	11111	1	95	0.8
33	31-45	2	1	1	1	6	6	0	15000	180000	2	5	0	3	1	1	1	1	1	11111	1	80	0.8
41	31-45	2	2	1	2	1	6	0	8000	96000	5	7	1	3	1	1	1	1	1	11111	1	80	0.8
30	16-30	2	2	1	1	5	6	0	20000	240000	4	2	2	3	1	1	1	1	1	11111	1	80	0.8
38	31-45	2	2	1	2	4	6	0	10000	120000	4	4	0	3	1	1	1	1	1	11111	1	80	0.8
37	31-45	2	2	1	1	6	7	9000	80000	960000	7	12	0	3	1	1	1	1	1	11111	1	80	0.8
60	60 & above	2	2	1	1	3	6	0	10000	120000	3	3	0	3	1	1	1	1	1	11111	1	80	0.8
52	46-59	2	2	1	1	1	6	0	40000	480000	13	4	1	3	1	1	1	1	1	11111	1	80	0.8
50	46-59	1	2	1	1	4	7	10000	10000	120000	5	4	2	3	1	1	1	1	1	11111	1	80	0.8
33	31-45	2	2	1	1	5	6	0	9000	108000	5	3	0	3	1	1	1	1	1	11111	1	80	0.8
33	31-45	1	2	1	1	4	7	12000	18000	216000	9	4	4	3	1	1	1	1	1	11111	1	80	0.8
49	46-59	2	2	1	1	1	6	0	10000	120000	2	4	1	3	1	1	1	1	1	11111	1	80	0.8
66	60 & Above	1	2	1	2	3	3	8000	8000	96000	5	2	0	3	1	1	1	1	1	11111	1	80	0.8
30	16-30	2	2	1	1	1	6	0	9000	108000	6	3	3	3	1	1	1	1	1	11111	1	80	0.8
50	46-59	1	2	1	1	1	7	6500	9000	108000	4	4	0	3	1	1	1	1	1	11111	1	80	0.8
50	46-59	1	2	1	2	4	1	10000	20000	240000	5	5	0	3	1	1	1	1	1	11111	1	80	0.8
47	46-59	1	2	1	1	6	7	30000	30000	360000	4	4	0	3	1	1	1	1	1	11111	1	80	0.8
41	31-45	1	2	1	2	4	11	0	5000	60000	4	3	1	3	1	1	1	1	1	11111	1	80	0.8
53	46-59	2	2	1	1	1	6	0	12000	144000	5	5	0	3	1	1	1	1	1	11111	1	80	0.8
24	16-30	2	1	2	2	5	8	0	8000	96000	6	6	0	3	1	1	1	1	1	11111	1	80	0.8
47	46-59	2	2	1	1	1	6	0	8000	96000	5	5	0	2	2	1	2	2	1	21221	0.594858	75	0.9
64	60 & Above	2	2	1	1	4	9	30000	50000	600000	4	4	1	2	2	1	2	2	1	21221	0.594858	85	0.8
45	31-45	1	2	1	2	4	7	10000	10000	120000	4	4	0	2	1	1	1	2	1	11121	0.78049	90	0.8
19	16-30	1	1	2	2	2	8	0	4500	54000	5	6	0	2	1	1	1	2	1	11121	0.78049	90	0.8
42	31-45	2	2	1	1	4	1	0	10000	120000	4	5	0	3	1	1	1	1	1	11111	1	80	0.8
41	31-45	1	2	1	1	5	5	0	9000	108000	2	4	1	3	1	1	1	1	1	11111	1	80	0.8
28	16-30	1	2	1	1	4	7	8300	18000	216000	10	7	3	3	1	1	1	1	1	11111	1	80	0.8
24	16-30	2	2	1	3	1	4	1500	7500	90000	5	4	0	3	1	1	1	1	1	11111	1	80	0.8
50	46-59	2	2	1	1	2	6	0	10000	120000	6	4	1	3	1	1	1	1	1	11111	1	80	0.8
44	31-45	2	2	1	1	4	6	0	15000	180000	5	5	1	3	1	1	1	1	1	11111	1	80	0.8
22	16-30	2	1	1	2	5	6	0	7500	90000	4	4	1	3	1	1	1	1	1	11111	1	80	0.8
30	16-30	2	2	1	1	2	6	0	12000	144000	4	4	0	3	1	1	1	1	1	11111	1	80	0.8
23	16-30	2	1	2	1	6	8	0	8000	96000	8	6	2	3	1	1	1	1	1	11111	1	80	0.8
39	31-45	2	2	1	1	5	6	0	20000	240000	4	3	0	3	1	1	1	1	1	11111	1	80	0.8
37	31-45	2	2	1	1	4	6	0	8500	102000	5	5	0	3	1	1	1	1	1	11111	1	80	0.8
35	31-45	2	2	2	2	3	6	0	8000	96000	6	6	0	3	1	1	1	1	1	11111	1	80	0.8
59	46-59	1	2	2	2	1	7	9000	9000	108000	5	3	0	2	1	1	1	2	1	11121	0.78049	90	0.9	0
39	31-45	1	2	1	1	5	4	12000	14000	168000	6	3	1	2	1	1	1	2	1	11121	0.78049	70	0.9
50	46-59	1	2	1	1	6	7	25000	25000	300000	3	3	0	2	5	4	4	4	2	54442	-0.153907	75	0.8
58	46-59	1	2	2	2	4	9	20000	20000	240000	6	4	2	2	5	4	4	4	2	54442	-0.153907	75	0.8
24	16-30	2	1	1	1	6	7	40000	80000	960000	3	3	0	2	4	3	4	4	5	43445	0.0794635	75	0.8
29	16-30	1	2	1	2	5	4	10000	15000	180000	4	5	0	2	3	2	5	3	3	32533	0.215249	75	0.8
31	31-45	2	2	1	2	6	6	0	15000	180000	6	6	0	2	3	3	4	4	3	33443	0.235947	75	0.8
28	16-30	1	2	1	1	5	4	20000	20000	240000	2	2	0	2	3	2	3	4	3	32343	0.302988	75	0.8
22	16-30	1	1	2	2	5	1	10000	10000	120000	2	3	0	2	1	1	1	2	1	11121	0.78049	70	0.9
25	16-30	2	2	2	2	5	6	0	15000	180000	5	4	0	2	1	1	1	2	1	11121	0.78049	70	0.9
17	16-30	2	1	1	2	5	6	0	7000	84000	5	5	0	2	1	1	1	2	1	11121	0.78049	70	0.9
26	16-30	2	2	1	1	7	7	10000	25000	300000	2	4	0	2	1	1	1	2	1	11121	0.78049	70	0.9
55	46-59	2	2	2	2	1	6	0	12000	144000	6	4	2	2	1	1	1	2	1	11121	0.78049	70	0.9
22	16-30	2	1	1	2	5	6	0	9000	108000	5	7	0	2	1	1	1	2	1	11121	0.78049	70	0.9
43	31-45	1	2	1	1	4	6	0	7000	84000	5	7	0	3	1	1	1	1	1	11111	1	80	0.8
50	46-59	1	2	1	2	4	4	10000	14000	168000	5	5	0	3	1	1	1	1	1	11111	1	80	0.8
30	16-30	1	2	1	2	1	6	0	10000	120000	14	4	2	3	1	1	1	1	1	11111	1	80	0.8
48	46-59	1	2	1	1	4	7	35000	40000	480000	5	5	0	3	1	1	1	1	1	11111	1	80	0.8
37	31-45	1	2	2	2	4	3	0	7000	84000	8	4	4	2	1	1	1	2	1	11121	0.78049	85	0.8
20	16-30	2	1	2	2	5	6	0	7000	84000	6	6	0	2	1	1	1	2	1	11121	0.78049	85	0.8
22	16-30	1	1	2	2	7	6	0	10000	120000	5	5	0	2	1	1	1	2	1	11121	0.78049	85	0.8
38	31-45	2	2	1	1	7	7	20000	35000	420000	5	5	0	2	1	1	2	1	1	11211	0.79063	90	0.9
43	31-45	2	2	2	2	2	6	0	7000	84000	4	7	0	2	1	1	2	1	1	11211	0.79063	50	0.9
32	31-45	2	2	1	2	3	6	0	10000	120000	4	5	0	2	1	1	2	1	1	11211	0.79063	90	0.8
25	16-30	1	2	1	2	3	7	6000	25000	300000	5	4	1	2	1	1	1	2	1	11121	0.78049	70	0.9
40	31-45	2	2	3	1	1	6	0	8000	96000	6	6	0	2	1	1	1	2	1	11121	0.78049	70	0.9
38	31-45	1	2	1	1	3	4	15000	15000	180000	7	4	2	2	1	1	1	2	1	11121	0.78049	70	0.9
35	31-45	2	3	1	2	1	7	4000	4000	48000	6	3	0	2	1	1	1	2	1	11121	0.78049	70	0.9
26	16-30	2	2	1	2	1	6	0	10000	120000	7	5	1	3	1	1	1	1	1	11111	1	80	0.8
46	46-59	1	2	1	2	4	3	5500	14000	168000	4	9	1	3	1	1	1	1	1	11111	1	80	0.8
30	16-30	1	2	1	2	5	7	5500	5500	66000	5	2	2	3	1	1	1	1	1	11111	1	80	0.8
38	31-45	2	2	1	1	5	6	0	12000	144000	3	3	1	2	1	1	1	2	1	11121	0.78049	70	0.9
16	16-30	2	1	1	1	5	6	0	12000	144000	5	5	0	2	1	1	1	2	1	11121	0.78049	70	0.9
26	16-30	1	1	2	1	5	7	10000	10000	120000	4	4	0	2	1	1	1	2	1	11121	0.78049	85	0.8
30	16-30	1	2	1	2	3	4	8000	12000	144000	6	7	2	2	2	1	1	2	3	21123	0.608778	75	0.7
13	0-15	1	1	1	1	3	8	0	17000	204000	1	5	0	2	2	1	1	2	3	21123	0.608778	75	0.8
27	16-30	2	1	1	1	7	7	15000	30000	360000	6	5	1	2	1	2	1	2	2	12122	0.615568	90	0.9
45	31-45	2	2	2	2	1	6	0	15000	180000	10	4	0	2	2	1	1	2	2	21122	0.616861	75	0.9
27	16-30	2	2	1	1	2	6	0	5250	63000	5	3	2	2	2	1	1	2	2	21122	0.616861	75	0.9
72	60 & Above	1	3	1	1	2	9	7000	20000	240000	6	4	1	2	1	1	2	1	1	11211	0.79063	90	0.9
43	31-45	1	2	1	1	7	7	50000	70000	840000	6	5	1	2	1	1	2	1	1	11211	0.79063	90	0.9
53	46-59	2	2	1	1	1	6	0	5000	60000	8	2	0	2	1	1	2	1	1	11211	0.79063	90	0.9
40	31-45	2	2	2	2	3	6	0	8000	96000	5	5	0	2	1	1	2	1	1	11211	0.79063	90	0.9
3	0-15	2	1	2	2	1	6	0	20000	240000	10	8	2	2	1	1	2	1	1	11211	0.79063	90	0.9
57	46-59	2	2	1	1	4	6	0	12000	144000	2	2	0	2	1	1	2	1	1	11211	0.79063	90	0.9
35	31-45	2	2	1	2	4	7	8000	12000	144000	15	4	0	2	1	1	2	1	1	11211	0.79063	90	0.9
40	31-45	2	2	1	1	4	6	0	20000	240000	5	3	0	2	1	1	2	1	1	11211	0.79063	90	0.9
30	16-30	2	2	2	2	7	6	0	10000	120000	4	5	0	2	1	1	2	1	1	11211	0.79063	95	0.9
22	16-30	2	2	1	1	5	6	0	40000	480000	6	12	3	2	1	1	2	1	1	11211	0.79063	75	0.8
32	31-45	2	3	1	2	1	6	0	8000	96000	6	12	1	2	1	1	2	1	1	11211	0.79063	90	0.9
30	16-30	1	2	1	1	4	7	8000	8000	96000	4	2	2	2	3	1	3	1	1	31311	0.618	85	0.9
43	31-45	2	2	1	2	2	6	0	7500	90000	4	4	0	2	1	2	1	3	1	12131	0.625249	85	0.8
32	31-45	2	2	1	1	1	6	0	6000	72000	4	5	1	2	2	1	2	1	2	21212	0.627206	80	0.8
64	60 & Above	1	2	2	2	4	9	10000	15000	180000	2	2	0	2	2	1	2	1	2	21212	0.627206	85	0.8
52	46-59	2	2	1	1	7	6	0	50000	600000	5	5	0	2	2	1	2	1	2	21212	0.627206	80	0.9
48	46-59	1	2	1	1	4	7	10000	15000	180000	4	4	0	2	2	1	2	1	2	21212	0.627206	85	0.8
39	31-45	1	2	1	1	6	3	20000	50000	600000	6	4	2	2	1	2	1	2	1	12121	0.64629	75	0.9
25	16-30	2	1	2	2	5	7	5000	10000	120000	6	5	0	2	1	1	2	3	3	11233	0.646671	80	0.7
21	16-30	2	1	1	2	6	6	0	8000	96000	4	5	0	2	1	1	2	3	3	11233	0.646671	75	0.8
36	31-45	2	2	1	2	3	6	0	5000	60000	3	4	1	2	3	3	4	3	2	33432	0.334582	80	0.7
49	46-59	2	2	2	2	1	6	0	10000	120000	13	5	0	2	3	3	4	3	2	33432	0.334582	80	0.7
52	46-59	2	2	2	2	2	6	0	15000	180000	5	5	1	2	2	2	2	3	4	22234	0.339901	80	0.7
27	16-30	1	1	1	2	6	4	12000	25000	300000	7	5	2	2	2	1	5	2	1	21521	0.383778	80	0.7
25	16-30	2	1	1	3	1	6	0	6000	72000	4	8	2	2	4	1	4	3	3	41433	0.419811	72	0.9
48	46-59	1	2	3	1	2	3	5000	5000	60000	3	5	0	2	4	1	4	3	3	41433	0.419811	72	0.9
24	16-30	2	2	2	2	6	6	0	12000	144000	12	9	3	2	3	2	3	3	2	32332	0.41986	72	0.9
25	16-30	1	2	1	1	2	6	0	12000	144000	5	6	1	2	2	1	3	3	4	21334	0.428981	72	0.9
17	16-30	2	1	2	2	3	6	0	10000	120000	5	5	0	2	2	1	3	3	4	21334	0.428981	72	0.9
24	16-30	2	1	1	1	4	6	0	8000	96000	5	5	0	2	3	2	2	3	2	32232	0.431531	60	0.7
40	31-45	2	2	2	2	2	5	0	8000	96000	4	4	1	2	3	2	3	2	2	32322	0.434179	60	0.7
46	46-59	1	2	1	2	1	3	6000	6000	72000	6	2	4	2	2	2	2	2	2	22222	0.467358	80	0.9
65	60 & Above	2	3	1	1	1	6	0	15000	180000	4	8	3	2	1	3	4	2	2	13422	0.4699	80	0.9
19	16-30	1	1	2	2	5	8	0	5000	60000	5	5	0	2	2	3	2	2	1	23221	0.472449	85	0.9
23	16-30	2	2	2	2	4	7	5000	5000	60000	3	3	0	2	2	2	2	3	1	22231	0.478379	70	0.9
49	46-59	2	2	1	2	5	6	0	8000	96000	5	5	0	2	2	2	2	3	1	22231	0.478379	80	0.9
19	16-30	1	1	2	2	4	8	0	25000	300000	4	3	0	2	1	2	4	2	2	12422	0.490149	70	0.7
50	46-59	2	2	2	2	1	6	0	5000	60000	5	6	2	2	2	2	2	2	1	22221	0.492934	80	0.9
32	31-45	2	2	3	2	2	6	0	10000	120000	5	8	3	2	2	2	2	2	1	22221	0.492934	85	0.8
40	31-45	1	2	1	1	5	4	12000	12000	144000	7	7	0	2	2	2	2	2	1	22221	0.492934	60	0.9
32	31-45	1	2	1	2	3	6	0	7000	84000	5	3	0	2	3	1	3	3	2	31332	0.520611	70	0.9
28	16-30	2	2	1	1	5	6	0	18000	216000	4	4	0	2	3	1	3	3	2	31332	0.520611	60	0.8
65	60 & Above	2	2	2	1	1	6	0	28000	336000	9	7	2	2	2	2	2	1	2	22212	0.525235	75	0.8
24	16-30	2	1	3	2	5	6	0	20000	240000	6	5	1	2	3	2	2	1	1	32211	0.52892
43	31-45	2	2	1	1	6	6	0	20000	240000	5	11	2	2	3	1	3	2	2	31322	0.53493	50	0.8
47	46-59	2	2	2	2	1	6	0	20000	240000	7	10	0	2	2	1	3	3	2	21332	0.54207	48	0.7
53	46-59	1	2	2	2	5	7	18000	18000	216000	6	4	0	2	2	1	2	3	3	21233	0.54713	75	0.8
64	60 & Above	2	2	2	1	1	6	0	50000	600000	5	6	0	2	2	2	2	1	1	22211	0.551565	80	0.9
28	16-30	2	2	1	2	5	6	0	15000	180000	6	7	2	2	2	2	2	1	1	22211	0.551565	63	0.9
30	16-30	1	1	2	2	3	7	6000	15000	180000	4	4	1	2	1	2	3	2	2	12322	0.555179	63	0.9
40	31-45	2	2	1	1	7	7	40000	60000	720000	4	4	0	2	2	1	1	2	1	21121	0.555179	63	0.9
42	31-45	2	2	1	1	6	7	8000	18000	216000	3	3	0	2	2	1	3	2	2	21322	0.556389	65	0.9
19	16-30	1	1	1	2	5	8	0	9000	108000	4	6	0	2	2	2	1	1	3	22113	0.565708	65	0.9
21	16-30	2	1	1	2	6	6	0	8000	96000	7	3	0	2	2	1	2	2	2	21222	0.568351	65	0.9
44	31-45	2	2	1	1	5	6	0	20000	240000	3	4	0	2	2	1	2	2	2	21222	0.568351	85	0.9
26	16-30	1	1	2	2	5	7	40000	40000	480000	6	6	0	2	2	1	2	2	2	21222	0.568351	70	0.9
47	46-59	2	2	2	2	1	6	0	3000	36000	4	3	0	2	2	1	2	2	2	21222	0.568351	70	0.9
36	31-45	2	2	2	2	2	6	0	10000	120000	6	6	0	2	2	1	2	2	2	21222	0.568351	50	0.9
32	31-45	1	2	1	1	5	4	15000	25000	300000	14	11	3	2	2	1	2	2	2	21222	0.568351	80	0.8
18	16-30	2	1	1	2	4	6	0	6000	72000	5	5	1	2	2	1	2	2	2	21222	0.568351
23	16-30	1	1	2	2	4	3	3000	5000	60000	5	6	0	2	2	1	2	3	1	21231	0.57913	98	0.9
18	16-30	1	1	1	1	4	6	0	7000	84000	3	5	0	2	3	3	3	2	1	33321	0.439319	60	0.7
40	31-45	2	3	1	3	1	6	0	12000	144000	5	5	0	2	3	2	2	2	2	32222	0.44585	65	0.7
38	31-45	2	1	2	1	4	6	0	10000	120000	6	7	0	2	3	2	2	2	2	32222	0.44585	70	0.9
20	16-30	2	1	2	2	5	8	0	6000	72000	6	5	0	2	2	2	3	2	3	22323	0.449027	55	0.9
20	16-30	2	1	2	2	3	6	0	10000	120000	3	3	0	2	2	2	3	2	3	22323	0.449027	60	0.9
27	16-30	1	1	1	1	6	7	8500	25000	300000	5	4	0	2	2	2	3	2	2	22322	0.455638	60	0.9
24	16-30	1	1	2	2	4	7	5000	20000	240000	7	4	0	2	2	2	3	2	2	22322	0.455638	60	0.9
43	31-45	1	2	2	2	2	7	6500	6500	78000	6	6	0	2	3	2	2	3	1	32231	0.45692	60	0.9
40	31-45	2	2	1	1	4	6	0	10000	120000	4	4	0	2	2	2	2	2	3	22223	0.460698	60	0.9
26	16-30	2	2	1	2	5	6	0	14000	168000	7	3	1	2	2	2	2	2	2	22222	0.467358	80	0.9
31	31-45	1	2	2	2	5	7	9000	40000	480000	6	5	1	2	2	1	2	3	1	21231	0.57913	75	0.8
40	31-45	2	1	1	1	4	6	0	50000	600000	5	5	0	2	1	1	2	3	2	11232	0.653282	60	0.8
31	31-45	1	2	2	2	5	2	18000	39000	468000	7	5	3	2	1	2	2	1	1	12211	0.656607	75	0.8
21	16-30	2	1	2	2	6	6	0	8000	96000	2	6	0	2	2	1	2	1	1	21211	0.658217	80	0.7
27	16-30	2	2	2	2	7	6	0	10000	120000	6	4	1	2	1	1	2	2	2	11222	0.669243	65	0.9
35	31-45	2	2	2	2	3	6	0	15000	180000	10	7	0	2	1	1	2	2	2	11222	0.669243	85	0.9
40	31-45	2	2	1	2	1	6	0	7000	84000	5	6	1	2	1	1	2	2	2	11222	0.669243	70	0.9
43	31-45	1	2	2	2	2	1	15000	15000	180000	2	2	0	2	1	3	1	1	1	13111	0.677	70	0.8
57	46-59	1	2	1	1	5	7	0	10000	120000	4	6	1	2	2	1	1	1	2	21112	0.680472	95	0.9
21	16-30	1	1	2	2	5	6	0	10000	120000	4	5	1	2	2	1	1	1	2	21112	0.680472	65	0.9
15	0-15	2	1	1	1	3	6	0	5000	60000	4	4	1	2	1	1	1	3	2	11132	0.700611	70	0.8
21	16-30	1	1	1	1	4	8	0	12000	144000	5	7	0	2	1	1	2	2	1	11221	0.700936	70	0.9
21	16-30	2	1	2	2	5	4	0	6000	72000	10	6	0	2	1	1	2	2	1	11221	0.700936	70	0.8
60	60 & Above	1	2	1	1	5	7	25000	30000	360000	3	3	0	2	1	1	2	2	1	11221	0.700936	85	0.8
60	60 & above	2	3	1	2	1	6	0	6000	72000	6	3	3	2	1	1	2	1	3	11213	0.718671	78	0.8
39	31-45	2	2	1	2	1	6	0	6000	72000	5	4	1	2	1	1	2	1	3	11213	0.718671	65	0.8
30	16-30	2	2	1	2	6	6	0	30000	360000	3	4	1	2	1	1	1	2	2	11122	0.723229	85	0.8
49	46-59	2	2	1	1	3	6	0	20000	240000	4	5	0	2	1	1	1	2	2	11122	0.723229	95	0.8
28	16-30	1	1	2	2	4	7	6000	20000	240000	5	4	0	2	1	1	1	2	2	11122	0.723229	80	0.8
66	60 & Above	1	2	1	1	2	6	0	35000	420000	2	5	1	2	1	1	1	2	2	11122	0.723229	70	0.8
21	16-30	1	1	2	2	5	7	10000	10000	120000	4	4	0	2	1	1	1	2	2	11122	0.723229	90	0.9
53	46-59	2	2	1	1	3	6	0	8000	96000	6	5	1	2	1	1	1	2	2	11122	0.723229	75	0.7
20	16-30	2	1	2	2	4	6	0	15000	180000	11	5	0	2	1	1	1	2	2	11122	0.723229	90	0.9
26	16-30	2	2	1	1	3	6	0	30000	360000	4	4	0	2	1	1	1	2	2	11122	0.723229	90	0.9
42	31-45	2	2	1	2	3	6	0	25000	300000	3	3	0	2	1	1	1	2	2	11122	0.723229	65	0.9
24	16-30	2	2	2	2	5	6	0	10000	120000	5	4	1	2	1	1	1	2	2	11122	0.723229	65	0.9
42	31-45	1	1	2	2	1	6	0	15000	180000	6	6	0	2	1	1	1	2	2	11122	0.723229	65	0.9
45	31-45	1	2	1	2	4	2	10000	10000	120000	6	3	3	2	1	1	1	2	2	11122	0.723229	70	0.8
37	31-45	1	2	1	1	5	7	18000	18000	216000	3	2	1	2	1	1	1	2	2	11122	0.723229	68	0.8
20	16-30	2	1	2	2	7	6	0	35000	420000	5	5	0	2	1	1	1	3	1	11131	0.726	90	0.8
41	31-45	2	2	1	2	1	6	0	8000	96000	5	4	0	2	1	1	1	3	1	11131	0.726	80	0.9
47	46-59	2	2	1	1	6	6	0	20000	240000	4	4	0	2	2	1	3	2	1	21321	0.581778	75	0.8
34	31-45	2	2	2	2	3	6	0	15000	180000	4	4	0	2	3	1	1	2	2	31122	0.59393	75	0.8
49	46-59	2	2	1	1	7	6	0	8000	96000	2	2	0	2	2	1	2	2	1	21221	0.594858	85	0.8
22	16-30	1	1	2	1	6	6	0	16000	192000	5	5	0	2	2	1	2	2	1	21221	0.594858	95	0.9
36	31-45	2	2	2	1	5	8	0	15000	180000	4	4	0	2	2	1	1	2	1	21121	0.647902	75	0.8
38	31-45	1	2	1	1	6	3	20000	30000	360000	6	4	0	2	2	1	1	2	1	21121	0.647902	70	0.9
45	31-45	2	2	2	2	5	6	0	20000	240000	9	5	0	2	2	1	1	2	1	21121	0.647902	70	0.9
19	16-30	1	1	2	2	5	6	0	10000	120000	5	14	0	2	2	1	1	2	1	21121	0.647902	70	0.9
25	16-30	1	1	2	2	6	1	15000	25000	300000	4	3	0	2	2	1	1	2	1	21121	0.647902	70	0.9
28	16-30	1	2	1	1	6	6	0	18000	216000	4	4	0	2	2	1	1	2	1	21121	0.647902	70	0.8
16	16-30	1	1	1	2	4	8	0	15000	180000	5	8	2	2	2	1	1	2	1	21121	0.647902	63	0.9
72	60 & Above	2	2	3	2	1	8	0	8000	96000	7	7	0	2	2	1	1	2	1	21121	0.647902	85	0.8
26	16-30	2	2	1	1	3	6	0	30000	360000	4	4	0	2	2	1	1	2	1	21121	0.647902	85	0.9
34	31-45	1	2	1	2	3	4	10000	10000	120000	7	5	2	2	2	1	1	2	1	21121	0.647902	80	0.8
63	60 & Above	2	3	1	1	3	9	0	35000	420000	4	6	1	2	1	1	2	3	2	11232	0.653282	75	0.6
75	60 & Above	2	2	2	1	6	6	0	60000	720000	2	19	0	2	1	1	1	3	1	11131	0.726	85	0.8
36	31-45	2	2	2	2	6	6	0	20000	240000	6	5	1	2	1	2	1	1	1	12111	0.731053	75	0.8
30	16-30	1	1	1	1	7	6	0	15000	180000	4	4	0	2	1	1	2	1	2	11212	0.733538	80	0.9
26	16-30	1	2	1	1	4	4	0	180000	2160000	12	11	1	2	2	1	1	1	1	21111	0.734283	100	0.7
22	16-30	1	1	2	2	6	6	0	15000	180000	7	7	0	2	2	1	1	1	1	21111	0.734283	90	0.8
28	16-30	1	2	2	2	6	1	25000	25000	300000	7	4	0	2	2	1	1	1	1	21111	0.734283	100	0.8
55	46-59	2	2	2	2	2	6	0	45000	540000	3	4	2	2	2	1	1	1	1	21111	0.734283	75	0.9
52	46-59	2	2	1	1	4	6	0	40000	480000	4	4	0	2	2	1	1	1	1	21111	0.734283	80	0.8
32	31-45	1	2	1	1	4	4	15000	25000	300000	5	10	4	2	2	1	1	1	1	21111	0.734283	80	0.8
39	31-45	2	2	1	1	3	6	0	20000	240000	4	4	0	2	2	1	1	1	1	21111	0.734283	80	0.8
40	31-45	2	2	1	1	3	6	0	15000	180000	3	5	0	2	1	1	1	2	1	11121	0.78049	75	0.7
48	46-59	2	2	1	1	2	6	0	30000	360000	5	3	0	2	1	1	1	2	1	11121	0.78049	65	0.9
17	16-30	2	2	1	1	5	6	0	25000	300000	8	2	0	2	1	1	1	2	1	11121	0.78049	80	0.9
28	16-30	2	2	2	1	5	6	0	40000	480000	4	4	2	2	1	1	1	2	1	11121	0.78049	95	0.8
21	16-30	1	1	2	2	2	3	4000	4000	48000	4	5	0	2	1	1	1	2	1	11121	0.78049	90	0.9
30	16-30	1	2	1	2	3	7	0	9000	108000	5	2	2	2	1	1	1	2	1	11121	0.78049	80	0.8
24	16-30	1	1	1	2	5	3	1000	8000	96000	6	4	0	2	1	1	1	2	1	11121	0.78049	75	0.7
26	16-30	1	2	1	2	5	8	0	15000	180000	5	3	0	2	1	1	1	2	1	11121	0.78049	90	0.8
32	31-45	1	2	1	2	5	7	12000	19000	228000	5	3	2	2	1	1	1	2	1	11121	0.78049	90	0.8
46	46-59	2	3	1	1	1	6	0	8000	96000	5	5	0	2	1	1	1	2	1	11121	0.78049	90	0.8
27	16-30	1	2	1	2	6	7	35000	50000	600000	10	2	8	2	1	1	1	1	2	11112	0.814345	90	0.9
22	16-30	1	1	1	2	6	6	0	12000	144000	5	5	0	2	1	1	1	1	2	11112	0.814345	75	0.9
26	16-30	1	1	2	2	5	7	10000	20000	240000	4	4	1	2	1	1	1	1	1	11111	1	90	0.8
23	16-30	1	1	1	2	4	7	6000	12000	144000	5	6	0	2	1	1	1	1	1	11111	1	90	0.8
26	16-30	1	1	1	1	5	8	0	15000	180000	4	5	0	2	1	1	1	1	1	11111	1	80	0.8
42	31-45	1	2	2	2	4	7	5000	8000	96000	4	5	0	2	1	1	1	1	1	11111	1	75	0.9
24	16-30	1	1	2	2	5	4	6000	15000	180000	9	4	2	2	1	1	1	1	1	11111	1	98	0.8
55	46-59	1	2	2	2	4	1	18000	18000	216000	5	5	0	2	1	1	1	1	1	11111	1	95	0.8
28	16-30	1	2	2	2	5	4	9000	12000	144000	6	3	0	2	1	1	1	1	1	11111	1	85	0.9
29	16-30	2	2	1	1	1	6	0	7000	84000	3	3	1	2	1	1	1	1	1	11111	1	90	0.8
20	16-30	1	1	1	2	2	4	9000	19000	228000	3	6	2	2	1	1	1	1	1	11111	1	65	0.8
32	31-45	2	2	1	1	5	1	0	15000	180000	8	3	2	2	1	1	1	1	1	11111	1	95	0.9
47	46-59	2	2	2	2	1	6	0	15000	180000	7	6	1	2	1	1	1	1	1	11111	1	95	0.9
39	31-45	1	2	2	2	2	3	4000	4000	48000	7	2	1	2	1	1	1	1	1	11111	1	90	0.9
51	46-59	2	2	2	1	4	6	0	40000	480000	11	2	0	2	1	1	1	1	1	11111	1	80	0.8
25	16-30	1	2	2	2	4	1	10000	15000	180000	4	3	1	2	1	1	1	1	1	11111	1	95	0.8
21	16-30	2	1	2	2	4	6	0	15000	180000	4	6	0	2	1	1	1	1	1	11111	1	85	0.8
26	16-30	2	2	2	2	5	6	0	26000	312000	7	5	2	2	1	1	1	1	1	11111	1	80	0.8
38	31-45	1	2	2	2	4	4	20000	20000	240000	7	4	1	2	1	1	1	1	1	11111	1	90	0.9
20	16-30	1	1	2	2	5	3	20000	20000	240000	15	5	0	2	1	1	1	1	1	11111	1	88	0.8
25	16-30	1	1	2	2	6	7	8000	15000	180000	5	8	0	2	1	1	1	1	1	11111	1	90	0.9
35	31-45	1	2	2	2	3	4	3000	8000	96000	3	2	1	2	1	1	1	1	1	11111	1	90	0.9
53	46-59	1	2	1	1	3	7	15000	15000	180000	4	4	0	2	1	1	1	1	1	11111	1	80	0.9
25	16-30	2	1	2	2	5	4	10000	20000	240000	5	3	0	2	1	1	1	1	1	11111	1	75	0.95
50	46-59	2	2	2	1	7	7	89000	150000	1800000	12	5	1	2	1	1	1	1	1	11111	1	90	0.9
38	31-45	1	2	2	2	4	1	20000	20000	240000	6	3	1	2	1	1	1	1	1	11111	1	65	0.8
38	31-45	2	2	1	2	2	6	0	7000	84000	4	3	0	2	1	1	1	1	1	11111	1	98	0.9
46	46-59	2	2	2	1	7	7	52000	120000	1440000	3	5	0	2	1	1	1	1	1	11111	1	95	0.8
23	16-30	2	1	1	2	5	6	0	10000	120000	4	5	0	2	1	1	1	1	1	11111	1	85	0.9
24	16-30	2	1	2	1	6	7	5000	20000	240000	5	6	0	2	1	1	1	1	1	11111	1	80	0.9
26	16-30	2	2	2	2	5	6	0	10000	120000	6	5	1	2	1	1	1	1	1	11111	1	80	0.7
28	16-30	2	2	1	2	2	6	0	6000	72000	6	3	2	2	1	1	1	1	1	11111	1	75	0.9
14	0-15	1	1	1	1	3	6	0	20000	240000	5	5	0	2	1	1	1	1	1	11111	1	80	0.8
14	0-15	1	1	1	1	3	6	0	20000	240000	5	5	0	2	1	1	1	1	1	11111	1	94	0.8
23	16-30	2	1	1	1	7	6	0	60000	720000	4	5	0	2	1	1	1	1	1	11111	1	95	0.8
44	31-45	2	2	1	1	5	6	0	25000	300000	7	4	0	2	1	1	1	1	1	11111	1	85	0.8
21	16-30	1	1	2	2	4	7	3000	7000	84000	4	6	0	2	1	1	1	1	1	11111	1	80	0.9
25	16-30	2	2	3	1	1	6	0	10000	120000	3	2	2	2	1	1	1	1	1	11111	1	80	0.9
30	16-30	1	2	1	2	3	7	5000	5000	60000	11	4	2	2	1	1	1	1	1	11111	1	90	0.9
64	60 & Above	2	2	1	1	3	6	0	30000	360000	7	2	0	2	1	1	1	1	1	11111	1	70	0.9
22	16-30	2	2	2	2	2	6	0	10000	120000	6	9	3	2	1	1	1	1	1	11111	1	85	0.9
46	46-59	2	2	2	2	4	6	0	20000	240000	12	4	0	2	1	1	1	1	1	11111	1	90	0.9
24	16-30	1	1	2	2	4	6	0	10000	120000	8	5	0	2	1	1	1	1	1	11111	1	80	0.9
36	31-45	2	2	2	2	5	6	20000	30000	360000	4	7	2	2	1	1	1	1	1	11111	1	90	0.9
30	16-30	1	2	2	2	4	2	9000	15000	180000	7	2	1	2	1	1	1	1	1	11111	1	82	0.9
29	16-30	1	1	2	2	6	7	20000	20000	240000	3	6	1	2	1	1	1	1	1	11111	1	85	0.8
25	16-30	1	1	2	2	5	7	10000	20000	240000	4	4	0	2	1	1	1	1	1	11111	1	75	0.9
25	16-30	1	1	2	2	5	7	9000	15000	180000	3	3	0	2	1	1	1	1	1	11111	1	95	0.9
35	31-45	2	2	2	2	4	6	0	15000	180000	11	5	0	2	1	1	1	1	1	11111	1	80	0.9
42	31-45	2	2	1	2	1	8	0	6000	72000	5	7	0	2	1	1	1	1	1	11111	1	85	0.9
27	16-30	1	1	2	2	5	3	10000	16000	192000	6	5	1	2	1	1	1	1	1	11111	1	85	0.9
37	31-45	2	2	1	1	1	6	0	6500	78000	4	4	0	2	1	1	1	1	1	11111	1	85	0.9
18	16-30	1	1	2	2	6	6	0	10000	120000	5	5	0	2	1	1	1	1	1	11111	1	85	0.9
49	46-59	2	2	1	2	1	6	0	3000	36000	4	4	0	2	1	1	1	1	1	11111	1	90	0.9
54	46-59	1	2	1	1	4	4	30000	30000	360000	4	4	0	2	1	1	1	1	1	11111	1	90	0.9
20	16-30	2	1	1	1	5	6	0	30000	360000	5	5	0	2	1	1	1	1	1	11111	1	85	0.9
29	16-30	2	2	1	1	4	6	0	20000	240000	9	2	1	2	1	1	1	1	1	11111	1	55	0.8
50	46-59	2	2	2	1	4	6	0	20000	240000	3	4	0	2	1	1	1	1	1	11111	1	88	0.9
24	16-30	2	1	1	2	4	6	0	7000	84000	4	4	0	2	1	1	1	1	1	11111	1	45	0.8
41	31-45	2	2	1	1	6	6	0	20000	240000	4	4	0	2	1	1	1	1	1	11111	1	95	0.9
41	31-45	1	2	2	2	5	7	20000	20000	240000	4	2	2	2	1	1	1	1	1	11111	1	95	0.9
54	46-59	1	2	1	1	5	4	6500	12000	144000	8	8	0	2	1	1	1	1	1	11111	1	70	0.9
33	31-45	2	2	2	2	4	6	0	12000	144000	4	3	1	2	1	1	1	1	1	11111	1	70	0.9
50	46-59	2	2	2	1	5	6	0	50000	600000	3	3	0	2	1	1	1	1	1	11111	1	70	0.9
45	31-45	2	2	2	2	2	6	0	7500	90000	4	4	0	2	1	1	1	1	1	11111	1	70	0.9
35	31-45	2	2	2	1	2	6	0	6000	72000	5	3	1	2	1	1	1	1	1	11111	1	85	0.8
37	31-45	1	2	1	1	4	7	8000	12000	144000	6	6	0	2	1	1	1	1	1	11111	1	85	0.8
30	16-30	1	2	2	2	4	4	15000	15000	180000	6	5	2	2	1	1	1	1	1	11111	1	85	0.8
48	46-59	2	3	1	2	3	6	0	10000	120000	4	3	1	2	1	1	1	1	1	11111	1	99	0.8
42	31-45	2	2	1	2	1	8	0	6000	72000	9	6	0	2	1	1	1	1	1	11111	1	80	0.8
22	16-30	2	1	1	2	3	4	1000	6000	72000	3	3	0	2	1	1	1	1	1	11111	1	85	0.9
30	16-30	1	2	2	1	7	7	40000	40000	480000	3	3	0	2	1	1	1	1	1	11111	1	75	0.8
33	31-45	2	2	2	2	3	6	0	8000	96000	9	6	1	2	1	1	1	1	1	11111	1	90	0.9
22	16-30	1	1	2	2	5	6	0	10000	120000	4	4	0	2	1	1	1	1	1	11111	1	90	0.9
40	31-45	2	2	1	1	4	6	0	14000	168000	4	3	1	2	1	1	1	1	1	11111	1	85	0.8
33	31-45	2	2	1	3	2	6	0	6000	72000	6	2	2	2	1	1	1	1	1	11111	1	95	0.7
32	31-45	2	2	1	1	6	7	12000	12000	144000	3	4	2	2	1	1	1	1	1	11111	1	85	0.8
36	31-45	1	2	1	1	3	3	6000	10000	120000	4	3	1	2	1	1	1	1	1	11111	1	90	0.8
23	16-30	1	1	1	2	5	7	6000	15000	180000	4	4	0	2	1	1	1	1	1	11111	1	95	0.8
50	46-59	2	2	1	1	4	6	0	10000	120000	5	5	0	2	1	1	1	1	1	11111	1	95	0.9
35	31-45	2	2	2	1	6	6	0	50000	600000	3	2	1	2	1	1	1	1	1	11111	1	90	0.9
24	16-30	1	1	2	2	5	6	0	10000	120000	4	4	0	2	1	1	1	1	1	11111	1	95	0.9
21	16-30	1	1	2	2	6	6	0	5000	60000	4	4	0	2	1	1	1	1	1	11111	1	85	0.8
24	16-30	1	1	1	2	2	7	6000	10000	120000	4	4	0	2	1	1	1	1	1	11111	1	85	0.8
30	16-30	2	2	1	1	5	6	0	40000	480000	4	4	2	2	1	1	1	1	1	11111	1	95	0.9
42	31-45	2	2	1	1	2	3	5000	15000	180000	4	4	0	2	1	1	1	1	1	11111	1	95	0.9
48	46-59	2	2	1	2	2	6	0	10000	120000	6	6	0	2	1	1	1	1	1	11111	1	95	0.9
32	31-45	1	2	1	1	5	7	20000	20000	240000	10	8	2	2	1	1	1	1	1	11111	1	80	0.8
40	31-45	1	2	2	2	4	6	0	3000	36000	4	4	0	2	1	1	1	1	1	11111	1	80	0.8
50	46-59	1	2	1	1	6	7	30000	30000	360000	3	3	0	2	1	1	1	1	1	11111	1	80	0.8
44	31-45	2	2	1	2	3	6	0	6000	72000	4	4	0	2	1	1	1	1	1	11111	1	80	0.8
27	16-30	2	2	1	2	7	7	10000	25000	300000	7	6	1	2	1	1	1	1	1	11111	1	94	0.9
42	31-45	2	2	1	1	1	6	0	15000	180000	7	5	0	2	1	1	1	1	1	11111	1	94	0.9
27	16-30	2	2	1	2	2	6	0	8000	96000	5	2	1	2	1	1	1	1	1	11111	1	94	0.9
51	46-59	2	2	1	1	2	6	0	28000	336000	4	4	1	2	1	1	1	1	1	11111	1	94	0.9
36	31-45	1	2	1	1	5	7	15000	15000	180000	6	2	2	2	1	1	1	1	1	11111	1	80	0.9
38	31-45	1	2	2	2	5	1	5000	5000	60000	4	3	0	2	1	1	1	1	1	11111	1	100	0.8
38	31-45	2	2	1	2	3	6	0	15000	180000	4	4	0	2	1	1	1	1	1	11111	1	100	0.8
58	46-59	2	2	1	1	4	6	0	25000	300000	3	3	0	2	1	1	1	1	1	11111	1	100	0.8
28	16-30	1	2	1	2	4	7	15000	15000	180000	3	5	3	2	1	1	1	1	1	11111	1	100	0.8
19	16-30	1	1	1	2	5	6	0	5000	60000	8	5	0	2	1	1	1	1	1	11111	1	100	0.8
23	16-30	1	1	3	1	5	6	0	10000	120000	3	6	2	2	1	1	1	1	1	11111	1	100	0.8
56	46-59	1	2	1	1	4	7	20000	20000	240000	6	3	0	2	1	1	1	1	1	11111	1	100	0.8
48	46-59	1	2	2	2	2	1	20000	20000	240000	2	6	0	2	1	1	1	1	1	11111	1	100	0.8
30	16-30	2	3	2	2	2	3	6000	6000	72000	2	2	0	2	1	1	1	1	1	11111	1	100	0.8
44	31-45	1	2	1	2	6	7	50000	60000	720000	3	4	1	2	1	1	1	1	1	11111	1	100	0.8
21	16-30	2	1	2	1	5	6	0	10000	120000	12	4	0	2	1	1	1	1	1	11111	1	100	0.8
22	16-30	1	1	1	2	5	6	0	100000	1200000	8	7	1	2	1	1	1	1	1	11111	1	100	0.8
17	16-30	2	1	2	2	5	6	0	8000	96000	6	6	0	2	1	1	1	1	1	11111	1	100	0.8
26	16-30	1	1	1	2	4	1	0	6500	78000	6	6	0	2	1	1	1	1	1	11111	1	100	0.8
35	31-45	2	2	1	1	6	6	0	20000	240000	4	2	2	2	1	1	1	1	1	11111	1	100	0.8
55	46-59	2	2	1	1	6	6	0	10000	120000	4	4	0	2	1	1	1	1	1	11111	1	100	0.8
21	16-30	2	1	1	2	5	6	0	8000	96000	5	5	0	2	1	1	1	1	1	11111	1	100	0.8
30	16-30	1	2	2	2	5	6	0	15000	180000	5	5	2	2	1	1	1	1	1	11111	1	100	0.8
38	31-45	2	2	1	1	4	6	0	12000	144000	7	5	0	2	1	1	1	1	1	11111	1	100	0.8
18	16-30	1	1	1	3	3	6	6000	6000	72000	5	4	0	2	1	1	1	1	1	11111	1	100	0.8
50	46-59	1	2	1	1	5	7	30000	30000	360000	6	3	0	2	1	1	1	1	1	11111	1	100	0.8
24	16-30	2	1	2	2	6	6	0	8000	96000	6	6	0	2	1	1	1	1	1	11111	1	100	0.8
62	60 & Above	2	2	2	1	4	6	0	25000	300000	5	4	2	2	1	1	1	1	1	11111	1	100	0.8
25	16-30	1	1	1	2	2	3	2200	5000	60000	3	2	0	2	1	1	1	1	1	11111	1	100	0.8
52	46-59	2	2	1	2	1	6	0	30000	360000	4	7	4	2	1	1	1	1	1	11111	1	100	0.8
28	16-30	2	2	1	2	4	6	0	30000	360000	3	2	2	2	1	1	1	1	1	11111	1	100	0.8
30	16-30	1	2	1	1	2	3	8000	8000	96000	7	5	0	2	1	1	1	1	1	11111	1	100	0.8
52	46-59	2	2	1	1	6	6	0	10000	120000	3	5	0	2	1	1	1	1	1	11111	1	100	0.8
27	16-30	1	2	1	1	6	7	8000	16000	192000	4	4	0	2	1	1	1	1	1	11111	1	100	0.8
20	16-30	2	1	2	2	5	6	0	20000	240000	4	5	0	2	1	1	1	1	1	11111	1	100	0.8
69	60 & Above	1	2	1	1	5	6	0	10000	120000	7	4	0	2	1	1	1	1	1	11111	1	100	0.8
24	16-30	2	2	1	1	1	6	0	7000	84000	4	2	0	2	1	1	1	1	1	11111	1	100	0.8
39	31-45	2	2	1	1	1	4	6000	6000	72000	4	4	0	2	1	1	1	1	1	11111	1	100	0.8
28	16-30	1	2	1	2	4	7	7500	15000	180000	14	5	1	2	1	1	1	1	1	11111	1	100	0.8
63	60 & Above	1	2	1	1	4	6	0	30000	360000	6	4	2	2	1	1	1	1	1	11111	1	100	0.8
46	46-59	1	2	1	2	4	4	8500	15000	180000	14	11	3	2	1	1	1	1	1	11111	1	100	0.8
40	31-45	2	2	1	2	4	6	0	8000	96000	4	4	0	2	1	1	1	1	1	11111	1	100	0.8
26	16-30	2	2	1	1	2	6	0	20000	240000	8	2	0	2	1	1	1	1	1	11111	1	100	0.8
23	16-30	2	1	1	1	4	6	0	29000	348000	4	6	2	2	1	1	1	1	1	11111	1	100	0.8
21	16-30	1	1	1	2	6	6	0	35000	420000	7	5	2	2	1	1	1	1	1	11111	1	100	0.8
65	60 & Above	2	2	1	2	1	6	0	10000	120000	6	6	4	2	1	1	1	1	1	11111	1	100	0.8
27	16-30	1	2	2	1	5	7	6000	50000	600000	15	14	1	2	1	1	1	1	1	11111	1	100	0.8
40	31-45	2	2	3	1	6	6	0	25000	300000	3	3	0	2	1	1	1	1	1	11111	1	100	0.8
75	60 & Above	2	2	2	1	1	6	0	10000	120000	6	5	0	2	1	1	1	1	1	11111	1	100	0.8
56	46-59	2	2	1	1	4	6	0	50000	600000	6	6	0	2	1	1	1	1	1	11111	1	100	0.8
42	31-45	1	2	1	1	1	6	0	30000	360000	5	4	1	2	1	1	1	1	1	11111	1	100	0.8
50	46-59	1	2	3	1	3	6	0	10000	120000	6	6	0	2	1	1	1	1	1	11111	1	100	0.8
50	46-59	2	2	1	1	1	6	0	8000	96000	5	5	0	2	1	1	1	1	1	11111	1	100	0.8
26	16-30	2	1	1	1	7	6	0	30000	360000	11	9	2	2	1	1	1	1	1	11111	1	100	0.8
42	31-45	2	2	1	1	6	6	0	28000	336000	3	3	0	2	1	1	1	1	1	11111	1	100	0.8
21	16-30	1	2	2	1	1	3	3000	5000	60000	5	6	1	2	1	1	1	1	1	11111	1	100	0.8
65	60 & Above	1	2	1	1	6	4	10000	50000	600000	6	5	1	2	1	1	1	1	1	11111	1	100	0.8
27	16-30	1	1	2	2	5	3	4500	9000	108000	5	4	0	2	1	1	1	1	1	11111	1	100	0.8
46	46-59	2	2	1	1	4	6	15000	15000	180000	4	4	0	2	1	1	1	1	1	11111	1	100	0.8
37	31-45	2	2	1	1	6	6	0	50000	600000	5	4	1	2	1	1	1	1	1	11111	1	100	0.8
20	16-30	1	1	1	1	5	6	0	25000	300000	4	4	0	2	1	1	1	1	1	11111	1	100	0.8
22	16-30	1	1	1	1	5	7	0	10000	120000	4	4	0	2	1	1	1	1	1	11111	1	100	0.8
38	31-45	2	2	2	2	4	6	0	8000	96000	3	4	2	2	1	1	1	1	1	11111	1	100	0.8
58	46-59	2	2	2	2	4	6	0	15000	180000	6	6	1	2	1	1	1	1	1	11111	1	100	0.8
38	31-45	2	2	1	1	7	7	15000	35000	420000	3	3	0	2	1	1	1	1	1	11111	1	100	0.8
36	31-45	2	3	1	1	6	8	0	8000	96000	5	3	2	2	1	1	1	1	1	11111	1	100	0.8
60	60 & above	2	2	2	2	1	6	0	5000	60000	10	10	0	2	1	1	1	1	1	11111	1	100	0.8
70	60 & Above	2	2	2	1	6	9	22000	44000	528000	5	5	0	2	1	1	1	1	1	11111	1	100	0.8
46	46-59	2	2	2	1	4	6	0	50000	600000	5	3	0	2	1	1	1	1	1	11111	1	100	0.8
42	31-45	2	2	1	1	2	6	0	8000	96000	5	5	0	2	1	1	1	1	1	11111	1	100	0.8
55	46-59	2	2	2	2	2	6	0	10000	120000	5	4	1	2	1	1	1	1	1	11111	1	100	0.8
67	60 & Above	2	2	1	1	3	6	0	25000	300000	4	6	0	2	1	1	1	1	1	11111	1	100	0.8
34	31-45	2	2	1	1	1	6	0	8000	96000	6	4	0	2	1	1	1	1	1	11111	1	100	0.8
27	16-30	1	2	1	2	5	6	0	4000	48000	5	0	4	1	1	1	1	1	1	11111	1	80	0.8
24	16-30	1	1	2	2	3	3	5000	10000	120000	4	5	0	1	1	1	1	1	1	11111	1	100	0.9
27	16-30	2	2	1	2	5	6	0	10000	120000	4	5	0	1	1	1	1	1	1	11111	1	85	0.8
24	16-30	1	1	1	2	4	3	5000	5000	60000	3	5	0	1	1	1	1	1	1	11111	1	95	0.9
16	16-30	2	1	1	1	4	6	0	9000	108000	4	4	0	1	1	1	2	1	1	11211	0.79063	100	0.8
34	31-45	2	2	1	1	5	6	0	15000	180000	3	2	1	2	1	1	1	1	1	11111	1	100	0.8
30	16-30	1	2	2	2	5	1	10000	20000	240000	8	6	2	2	1	1	1	1	1	11111	1	100	0.8
25	16-30	1	1	2	2	6	7	22000	80000	960000	6	6	0	1	1	1	1	1	1	11111	1	100	0.9
25	16-30	1	1	2	2	2	1	10000	10000	120000	4	4	0	1	1	1	1	1	1	11111	1	90	0.9
18	16-30	2	1	1	1	5	8	0	30000	360000	4	4	0	1	1	1	1	1	1	11111	1	85	0.9
22	16-30	2	1	1	2	6	6	0	7000	84000	6	6	0	1	1	1	1	2	2	11122	0.723229	77	0.9
28	16-30	1	1	1	2	7	12	0	8000	96000	5	2	0	1	1	1	1	1	1	11111	1	95	0.8
20	16-30	1	1	2	2	5	6	0	10000	120000	2	6	2	1	1	1	1	1	1	11111	1	90	0.7
22	16-30	2	1	2	2	6	6	0	19000	228000	8	4	0	1	2	1	1	1	1	21111	0.734283	80	0.8
60	60 & above	1	2	1	3	1	4	6000	6000	72000	4	2	0	1	1	1	2	1	1	11211	0.79063	98	0.8
16	16-30	1	1	1	2	4	6	0	5000	60000	5	5	0	1	1	1	1	1	1	11111	1	95	0.8
15	0-15	1	1	2	2	4	6	0	15000	180000	4	13	2	1	1	1	1	1	1	11111	1	100	0.8
22	16-30	1	1	2	2	2	8	0	20000	240000	3	6	1	1	1	1	1	1	1	11111	1	90	0.9
16	16-30	1	1	1	2	4	6	0	10000	120000	3	6	0	1	1	1	1	1	1	11111	1	100	0.95
21	16-30	1	1	2	2	5	6	0	8000	96000	6	4	0	1	1	1	1	1	1	11111	1	100	0.9
21	16-30	1	1	2	2	5	8	0	30000	360000	4	11	0	1	1	1	1	1	1	11111	1	95	0.9
15	0-15	1	1	2	2	4	8	0	15000	180000	5	13	2	1	1	1	1	1	1	11111	1	100	0.9
24	16-30	1	2	2	2	4	3	5000	10000	120000	8	6	2	1	2	1	3	3	2	21332	0.54207	90	0.9
22	16-30	1	1	2	2	2	4	2500	7500	90000	8	5	0	1	1	1	1	1	1	11111	1	85	0.9
28	16-30	1	2	2	2	4	2	5000	12000	144000	5	7	2	1	1	1	1	2	1	11121	0.78049	77	0.9
21	16-30	1	1	2	2	5	6	0	20000	240000	5	5	0	1	1	1	1	2	1	11121	0.78049	95	0.95
29	16-30	1	2	2	1	7	7	43000	60000	720000	5	6	0	1	1	1	1	1	1	11111	1	90	0.95
16	16-30	1	1	2	1	2	8	0	6000	72000	4	4	0	1	1	1	1	1	1	11111	1	98	0.9
20	16-30	1	1	1	1	6	6	0	20000	240000	3	4	0	1	1	1	1	1	1	11111	1	98	0.9
24	16-30	1	1	2	2	4	7	25000	30000	360000	6	4	0	1	1	1	1	1	1	11111	1	95	0.9
18	16-30	1	1	2	2	4	6	0	10000	120000	7	8	0	1	2	1	1	2	1	21121	0.647902	95	1
17	16-30	1	1	1	2	4	6	0	5500	66000	5	6	0	1	1	1	1	1	1	11111	1	100	0.9
27	16-30	1	1	1	1	4	6	0	12000	144000	6	3	2	1	2	1	2	2	2	21222	0.568351	100	0.9
24	16-30	2	1	1	2	4	6	0	4500	54000	6	5	0	1	2	1	2	3	3	21233	0.54713	95	0.9
18	16-30	2	1	2	2	5	6	0	7000	84000	5	5	0	1	1	1	1	1	1	11111	1	100	0.9
14	0-15	1	1	2	1	3	8	0	15000	180000	4	4	0	1	1	1	1	1	1	11111	1	100	0.9
20	16-30	1	1	1	2	4	7	0	20000	240000	5	5	0	1	1	1	1	1	1	11111	1	100	0.9
21	16-30	1	1	3	1	1	4	4000	12000	144000	7	5	0	2	1	1	1	1	2	11112	0.814345	80	0.8
45	31-45	2	2	2	2	3	6	0	8000	96000	4	4	0	2	1	1	1	1	2	11112	0.814345	68	0.8
20	16-30	2	1	1	2	5	6	0	35000	420000	5	5	0	2	1	1	1	1	2	11112	0.814345	68	0.8
27	16-30	1	1	2	2	4	7	7000	12000	144000	3	5	2	2	1	1	1	1	2	11112	0.814345	68	0.8
45	31-45	2	2	1	1	2	7	2000	18000	216000	4	6	0	2	1	1	1	1	2	11112	0.814345	75	0.9
47	46-59	2	2	2	2	1	6	0	15000	180000	11	11	0	2	1	1	1	1	1	11111	1	95	0.8
29	16-30	1	1	2	2	2	6	0	30000	360000	6	5	1	2	1	1	1	1	1	11111	1	85	0.9
50	46-59	2	2	1	1	1	6	0	30000	360000	9	6	3	2	1	1	1	2	1	11121	0.78049	90	0.8
20	16-30	2	1	2	2	7	8	0	4500	54000	4	5	0	2	1	1	1	2	1	11121	0.78049	90	0.8
45	31-45	2	2	2	1	4	6	0	12000	144000	5	5	0	2	1	1	2	1	1	11211	0.79063	90	0.9
42	31-45	1	2	1	1	1	7	7500	7500	90000	9	4	2	2	1	1	2	1	1	11211	0.79063	90	0.9
65	60 & Above	2	2	1	2	2	6	0	10000	120000	9	3	0	2	1	1	2	1	1	11211	0.79063	90	0.9
31	31-45	2	2	1	1	2	6	0	14000	168000	5	3	1	2	1	1	1	1	2	11112	0.814345	85	0.7
29	16-30	1	2	2	2	5	7	0	10000	120000	6	5	0	2	1	1	1	1	2	11112	0.814345	85	0.7
22	16-30	1	1	2	2	5	6	0	15000	180000	4	4	0	2	1	1	1	1	2	11112	0.814345	85	0.7
37	31-45	2	2	1	2	5	6	0	5000	60000	5	3	2	2	1	1	1	1	2	11112	0.814345	85	0.7
45	31-45	2	2	2	1	5	6	0	40000	480000	5	4	0	2	1	1	1	1	2	11112	0.814345	80	0.9
24	16-30	1	1	1	2	5	5	7000	40000	480000	6	5	1	2	1	1	1	1	1	11111	1	86	0.8
49	46-59	2	2	1	1	1	6	0	12000	144000	7	6	1	2	1	1	1	1	1	11111	1	90	0.8
53	46-59	1	2	1	1	5	6	0	20000	240000	3	3	0	2	1	1	1	1	1	11111	1	95	0.9
20	16-30	2	1	1	1	6	6	0	54000	648000	5	5	0	2	1	1	1	1	1	11111	1	90	0.9
45	31-45	2	2	1	1	2	6	0	11000	132000	5	4	0	2	1	1	1	1	1	11111	1	90	0.9
54	46-59	1	2	1	1	4	7	25000	25000	300000	6	3	0	2	1	1	1	1	1	11111	1	90	0.8
47	46-59	2	2	1	2	4	6	0	6000	72000	7	6	0	2	1	1	1	1	1	11111	1	75	0.8
52	46-59	2	2	1	2	1	6	0	25000	300000	3	3	5	2	1	1	1	1	1	11111	1	85	0.8
39	31-45	2	2	2	2	4	6	0	20000	240000	4	4	0	2	1	1	1	1	1	11111	1	100	0.8
32	31-45	2	1	2	2	3	6	0	10000	120000	6	7	0	2	1	1	1	1	1	11111	1	90	0.9
28	16-30	2	1	2	2	6	7	10000	20000	240000	3	5	0	2	1	1	1	1	1	11111	1	90	0.9
27	16-30	1	1	1	1	5	5	9000	15000	180000	4	5	1	2	1	1	1	1	1	11111	1	90	0.9
24	16-30	1	1	1	1	5	7	8000	8000	96000	6	5	0	2	1	1	1	1	1	11111	1	90	0.8
45	31-45	1	2	2	1	4	4	10000	10000	120000	5	6	2	2	1	1	1	1	1	11111	1	90	0.9
38	31-45	1	2	1	1	4	7	18000	18000	216000	8	2	2	2	1	1	1	1	1	11111	1	80	0.8
23	16-30	1	1	1	2	5	6	0	5000	60000	4	5	0	2	1	1	1	1	1	11111	1	95	0.6
38	31-45	1	2	2	2	2	6	0	5000	60000	8	2	0	2	1	1	1	1	1	11111	1	85	0.9
63	60 & Above	1	2	1	1	4	6	0	50000	600000	4	4	0	2	1	1	1	1	1	11111	1	90	0.9
22	16-30	1	1	1	2	5	6	0	20000	240000	6	5	1	2	1	1	1	1	1	11111	1	80	0.9
66	60 & Above	2	2	2	1	6	6	0	30000	360000	9	4	0	2	1	1	1	1	1	11111	1	75	0.9
47	46-59	2	2	2	2	2	6	0	40000	480000	6	7	2	2	1	1	1	1	1	11111	1	95	0.9
36	31-45	2	2	2	1	4	6	0	5000	60000	6	5	0	2	1	1	1	1	1	11111	1	95	0.9
70	60 & Above	2	2	2	2	1	6	0	8000	96000	4	4	0	2	1	1	1	1	1	11111	1	90	0.8
25	16-30	1	1	1	2	5	3	5000	5000	60000	5	4	0	1	1	1	1	1	1	11111	1	100	0.9
16	16-30	1	1	2	1	4	6	0	40000	480000	4	4	0	1	1	1	1	1	1	11111	1	100	0.9
25	16-30	1	2	1	2	2	3	4500	7500	90000	6	4	2	1	1	1	1	1	1	11111	1	100	0.95
24	16-30	2	1	2	2	2	6	0	8000	96000	7	4	0	1	1	1	1	1	1	11111	1	100	0.9
25	16-30	1	1	1	1	6	6	0	12000	144000	4	5	0	1	1	1	1	1	1	11111	1	100	1
25	16-30	1	2	2	2	6	6	0	7000	84000	10	7	3	1	1	1	1	1	1	11111	1	90	1
22	16-30	1	1	2	2	5	6	0	30000	360000	4	4	0	1	1	1	1	1	1	11111	1	100	0.9
47	46-59	1	2	1	1	4	7	12000	15000	180000	6	5	0	1	1	1	1	1	1	11111	1	95	0.8
28	16-30	1	1	2	2	5	7	10000	20000	240000	4	4	0	1	1	1	1	1	1	11111	1	90	0.9
24	16-30	2	1	1	1	6	6	0	15000	180000	10	7	3	1	1	1	1	1	1	11111	1	80	0.9
18	16-30	1	1	2	1	4	6	0	8000	96000	5	5	0	1	1	1	1	1	1	11111	1	98	0.8
34	31-45	2	2	1	2	2	3	1200	8000	96000	5	5	0	1	2	1	2	3	2	21232	0.553741	95	1
23	16-30	2	2	1	2	5	6	0	35000	420000	12	11	1	1	1	1	1	1	1	11111	1	80	0.8
32	31-45	2	2	2	2	2	6	0	6000	72000	4	3	1	1	1	1	1	1	1	11111	1	100	0.9
23	16-30	2	1	1	2	3	6	0	7500	90000	4	4	0	1	1	1	1	1	1	11111	1	85	0.9
27	16-30	2	1	1	1	7	7	16000	25000	300000	6	4	0	1	1	1	2	1	1	11211	0.79063	100	0.9
15	0-15	1	1	1	1	3	8	0	6000	72000	8	7	0	1	1	1	1	1	1	11111	1	100	0.9
23	16-30	2	1	2	2	6	6	0	7000	84000	4	6	0	1	2	1	1	2	1	21121	0.647902	100	0.95
26	16-30	1	1	2	1	5	7	35000	80000	960000	4	4	0	1	1	1	1	1	1	11111	1	90	1
19	16-30	2	1	2	2	5	6	0	30000	360000	3	4	0	1	1	1	1	1	1	11111	1	100	0.9
14	0-15	1	2	1	1	3	6	0	16000	192000	8	4	0	1	1	1	1	1	1	11111	1	95	0.9
28	16-30	1	1	1	2	6	4	10000	35000	420000	6	5	1	1	1	1	1	1	1	11111	1	95	0.9
22	16-30	2	1	2	2	5	6	0	10000	120000	4	6	0	1	1	1	1	1	1	11111	1	100	0.95
23	16-30	1	1	1	2	3	3	15000	15000	180000	6	5	0	1	1	1	1	1	1	11111	1	90	0.9
21	16-30	1	1	1	1	4	7	5000	12000	144000	4	4	1	1	1	1	1	1	1	11111	1	100	0.9
20	16-30	2	2	2	2	5	6	0	6000	72000	5	5	0	1	1	1	1	1	1	11111	1	100	0.9
23	16-30	1	1	2	2	4	6	0	8000	96000	14	5	2	1	1	1	1	1	1	11111	1	95	0.9
26	16-30	2	1	1	1	5	3	17000	17000	204000	7	13	1	1	1	1	1	1	2	11112	0.814345	90	0.9
14	0-15	1	1	2	2	3	6	0	10000	120000	2	7	0	1	1	1	1	1	1	11111	1	80	0.9
12	0-15	2	2	1	1	2	10	0	8000	96000	5	2	2	1	1	1	1	1	1	11111	1	98	0.8
25	16-30	1	1	2	1	5	8	0	3000	36000	3	4	0	1	1	1	1	1	1	11111	1	95	0.8
17	16-30	2	1	2	2	6	8	0	6000	72000	4	5	0	1	1	1	1	1	1	11111	1	80	0.8
27	16-30	2	1	2	2	6	6	0	10000	120000	5	5	0	1	1	1	1	1	1	11111	1	100	1
41	31-45	1	2	1	1	2	3	10000	10000	120000	5	7	2	1	1	1	1	1	1	11111	1	85	0.8
23	16-30	1	1	1	2	4	5	12000	15000	180000	5	4	0	1	1	1	1	1	1	11111	1	95	0.9
26	16-30	1	1	1	1	6	6	0	5000	60000	3	3	0	1	1	1	1	1	1	11111	1	100	0.9
20	16-30	2	1	2	2	5	6	0	20000	240000	4	4	0	1	1	1	1	1	1	11111	1	100	1
23	16-30	1	1	1	2	6	8	0	15000	180000	13	11	2	1	1	1	1	1	1	11111	1	90	0.9
19	16-30	1	1	1	2	5	6	0	1000	12000	4	4	0	1	1	1	1	1	1	11111	1	100	0.9
24	16-30	1	2	2	1	2	3	5000	10000	120000	5	5	0	1	1	1	1	1	1	11111	1	95	0.9
27	16-30	2	2	2	2	5	6	0	10000	120000	6	6	0	1	1	1	1	1	1	11111	1	95	0.95
26	16-30	1	1	1	1	6	6	0	25000	300000	4	4	0	1	1	1	1	1	1	11111	1	100	1
23	16-30	1	1	1	1	5	6	0	12000	144000	10	5	0	1	1	1	1	1	1	11111	1	90	0.9
45	31-45	2	2	2	1	4	6	0	12000	144000	5	5	0	1	1	1	1	1	1	11111	1	85	1
22	16-30	2	1	1	2	5	6	0	10000	120000	6	6	0	1	1	1	1	1	1	11111	1	95	0.9
23	16-30	2	1	1	1	7	7	8000	30000	360000	3	6	0	1	1	1	2	1	1	11211	0.79063	95	1
20	16-30	1	1	2	2	6	6	0	15000	180000	15	13	2	1	1	1	1	1	1	11111	1	90	1
20	16-30	1	1	2	2	5	2	4000	10000	120000	4	4	0	1	1	1	1	1	1	11111	1	80	0.9
21	16-30	1	1	2	1	5	6	0	20000	240000	4	6	0	1	1	1	1	1	1	11111	1	98	1
25	16-30	1	1	1	1	5	7	6000	30000	360000	5	5	0	1	1	1	1	1	1	11111	1	95	1
17	16-30	2	1	1	2	6	6	0	7500	90000	4	4	0	1	1	1	1	1	1	11111	1	80	0.9
18	16-30	2	1	2	2	5	6	0	10000	120000	3	4	0	1	1	1	1	1	1	11111	1	100	0.9
24	16-30	1	2	2	2	4	3	6000	10000	120000	5	3	0	1	1	1	1	1	1	11111	1	85	1
19	16-30	2	1	1	2	6	6	0	12000	144000	4	4	0	1	1	1	1	1	1	11111	1	95	0.9
20	16-30	1	1	2	1	4	6	0	7000	84000	4	4	0	1	1	1	1	1	1	11111	1	100	0.9
30	16-30	1	1	1	2	4	1	7000	27000	324000	9	8	1	1	1	1	1	1	1	11111	1	100	1
28	16-30	1	2	2	2	5	1	10000	10000	120000	4	3	1	1	1	1	1	1	1	11111	1	100	0.9
20	16-30	1	1	3	2	5	8	0	30000	360000	5	5	0	1	1	1	1	1	1	11111	1	100	0.9
36	31-45	1	2	1	1	5	7	20000	30000	360000	4	4	0	1	1	1	1	1	1	11111	1	95	0.9
22	16-30	1	1	1	1	5	4	12000	35000	420000	3	3	0	1	1	1	1	1	1	11111	1	95	1
50	46-59	2	2	1	2	2	6	0	14000	168000	4	4	0	3	5	4	4	4	2	54442	-0.153907	75	0.8
48	46-59	1	2	1	1	6	7	20000	35000	420000	11	4	0	3	4	3	4	4	4	43444	0.145681	75	0.8
49	46-59	2	2	2	2	1	6	0	5000	60000	5	6	1	3	3	3	4	3	2	33432	0.334582	65	0.8
25	16-30	1	1	2	1	4	6	0	15000	180000	5	5	0	3	2	2	4	3	3	22433	0.369679	60	0.7
39	31-45	2	2	1	2	5	6	0	8000	96000	4	3	1	3	2	1	1	2	5	21125	0.391778	70	0.7
47	46-59	2	2	2	2	1	6	0	20000	240000	4	4	0	3	2	1	1	2	5	21125	0.391778	95	0.7
28	16-30	2	2	1	1	1	6	0	9000	108000	5	4	0	3	3	4	3	1	2	34312	0.408417	75	0.7
42	31-45	1	2	1	1	4	3	10000	10000	120000	3	4	0	3	4	1	2	4	1	41241	0.418962	60	0.8
60	60 & Above	1	2	1	1	5	6	0	15000	180000	5	5	0	3	3	2	3	3	2	32332	0.41986	80	0.8
48	46-59	2	2	1	1	1	6	0	15000	180000	7	6	1	3	3	2	3	3	2	32332	0.41986	70	0.8
53	46-59	2	2	1	1	1	6	0	10000	120000	5	5	0	3	3	2	2	3	2	32232	0.431531	85	0.9
55	46-59	2	2	1	1	1	6	0	37000	444000	4	6	2	3	3	2	2	2	2	32222	0.44585	85	0.8
42	31-45	2	2	2	2	3	6	0	12000	144000	5	4	0	3	3	2	2	2	2	32222	0.44585	75	0.8
35	31-45	2	1	2	1	6	8	0	30000	360000	5	4	0	3	2	2	2	3	3	22233	0.446379	70	0.8
40	31-45	2	2	2	2	4	6	0	25000	300000	4	5	9	3	4	2	2	1	3	42213	0.464468	95	0.9
43	31-45	2	2	1	1	4	6	0	20000	240000	5	5	0	3	2	2	2	2	2	22222	0.467358	75	0.8
31	31-45	2	2	1	1	1	6	0	30000	360000	4	4	0	3	2	2	2	2	2	22222	0.467358	75	0.8
31	31-45	2	2	1	2	3	6	0	7500	90000	7	6	1	3	2	2	2	2	2	22222	0.467358	95	0.9
54	46-59	2	2	2	1	1	6	0	6000	72000	6	3	0	3	3	1	4	2	2	31422	0.4699	82	0.9
44	31-45	1	2	1	1	5	7	50000	50000	600000	4	4	0	3	4	2	3	1	1	42311	0.484797	90	0.8
50	46-59	2	2	1	1	1	6	0	10000	120000	5	4	0	3	1	1	3	1	5	11315	0.49	85	0.9
55	46-59	2	2	2	2	2	6	0	15000	180000	6	4	2	3	2	2	2	2	1	22221	0.492934	80	0.8
57	46-59	2	2	1	1	3	6	0	55000	660000	4	6	3	3	2	2	2	2	1	22221	0.492934	90	0.9
40	31-45	1	2	2	2	4	7	5000	10000	120000	2	4	0	3	2	2	2	2	1	22221	0.492934	70	0.8
43	31-45	2	2	1	1	1	6	0	8000	96000	6	4	0	3	2	2	2	2	1	22221	0.492934	65	0.8
46	46-59	2	2	1	1	1	6	0	12000	144000	3	3	0	3	2	2	2	2	1	22221	0.492934	95	0.9
45	31-45	1	2	2	2	4	7	6000	10000	120000	7	5	0	3	2	2	2	2	1	22221	0.492934	60	0.9
44	31-45	2	2	1	1	5	6	0	9000	108000	3	5	0	3	2	2	2	2	1	22221	0.492934	70	0.9
60	60 & above	2	2	2	2	1	6	0	8000	96000	4	3	1	3	3	1	3	3	2	31332	0.520611	80	0.7
26	16-30	2	2	2	1	6	6	0	18000	216000	13	2	0	3	3	1	3	2	2	31322	0.53493	60	0.8
28	16-30	2	2	1	1	3	6	0	6000	72000	7	5	0	3	1	2	3	3	2	12332	0.54086	75	0.8
29	16-30	1	2	1	2	3	3	0	7000	84000	4	2	2	3	3	1	3	3	1	31331	0.546	70	0.8
35	31-45	2	2	1	1	4	1	0	10000	120000	7	4	0	3	3	1	2	2	2	31222	0.546601	80	0.8
45	31-45	2	2	1	1	1	6	0	7500	90000	5	5	0	3	2	2	2	1	1	22211	0.551565	95	0.8
44	31-45	1	2	1	1	6	2	20000	20000	240000	6	5	1	3	2	2	2	1	1	22211	0.551565	70	0.8
35	31-45	2	2	2	2	1	6	0	25000	300000	4	5	0	3	2	2	2	1	1	22211	0.551565	85	0.8
44	31-45	2	2	2	1	3	6	0	9500	114000	3	3	0	3	2	1	2	3	2	21232	0.553741	90	0.9
55	46-59	2	2	1	1	1	6	0	6500	78000	3	3	0	3	3	1	3	2	1	31321	0.560319	90	0.7
26	16-30	2	2	1	2	6	6	30000	30000	360000	5	2	1	3	2	1	2	2	2	21222	0.568351	90	0.9
54	46-59	2	2	1	1	6	6	0	15000	180000	6	5	0	3	2	1	2	2	2	21222	0.568351	75	0.8
27	16-30	2	1	2	2	6	7	9000	20000	240000	3	3	0	3	2	1	2	3	1	21231	0.57913	100	0.9
45	31-45	1	2	2	2	1	3	5000	5000	60000	5	5	0	3	1	2	2	2	1	12221	0.593568	65	0.9
43	31-45	2	2	1	1	3	6	0	8000	96000	5	5	0	3	2	1	2	2	1	21221	0.594858	85	0.8
68	60 & Above	2	2	1	1	3	6	0	20000	240000	7	7	0	3	2	1	2	2	1	21221	0.594858	68	0.8
30	16-30	2	2	1	1	3	6	0	30000	360000	15	3	1	3	2	1	2	2	1	21221	0.594858	75	0.8
21	16-30	2	1	1	2	5	6	0	7000	84000	5	7	0	3	2	1	2	2	1	21221	0.594858	80	0.9
19	16-30	1	1	1	1	4	6	0	12000	144000	5	5	0	3	2	1	2	2	1	21221	0.594858	70	0.9
40	31-45	2	2	1	3	1	6	0	8000	96000	4	4	0	3	3	1	2	1	2	31212	0.604282	75	0.8
52	46-59	1	2	1	1	2	3	10000	15000	180000	3	4	1	3	3	1	1	3	1	31131	0.605	85	0.8
37	31-45	2	2	2	2	3	6	0	10000	120000	4	4	0	3	1	1	1	4	1	11141	0.615739	65	0.9
33	31-45	2	2	1	1	6	6	0	15000	180000	4	5	1	3	2	1	1	2	2	21122	0.616861	80	0.9
41	31-45	1	2	1	1	6	4	30000	30000	360000	6	3	1	3	2	1	1	2	2	21122	0.616861	80	0.9
44	31-45	2	2	1	1	2	4	3000	10000	120000	5	5	0	3	2	1	1	2	2	21122	0.616861	90	0.8
46	46-59	2	2	1	1	4	6	0	7000	84000	5	5	0	3	2	1	1	2	2	21122	0.616861	90	0.9
52	46-59	2	2	1	2	3	6	0	12000	144000	4	3	0	3	2	1	1	2	2	21122	0.616861	48	0.7
33	31-45	2	2	2	2	2	6	0	2000	24000	4	8	2	3	3	1	1	2	1	31121	0.619319	100	0.8
52	46-59	1	2	1	1	4	7	15000	20000	240000	7	5	0	3	2	1	3	1	1	21311	0.639459	85	0.9
35	31-45	1	2	1	1	5	7	25000	25000	300000	5	5	1	3	2	1	1	2	1	21121	0.647902	90	0.9
35	31-45	2	2	1	2	4	4	15000	20000	240000	2	2	0	3	2	1	1	2	1	21121	0.647902	90	0.9
43	31-45	2	2	2	1	7	7	60000	200000	2400000	4	4	0	3	2	1	1	2	1	21121	0.647902	85	0.9
37	31-45	2	3	1	1	3	7	9000	9000	108000	6	3	1	3	2	1	1	2	1	21121	0.647902	80	0.8
49	46-59	2	2	2	1	5	6	0	20000	240000	10	6	0	3	2	1	1	2	1	21121	0.647902	70	0.9
23	16-30	1	1	2	2	5	8	0	35000	420000	4	4	0	3	2	1	1	2	1	21121	0.647902	85	0.8
41	31-45	2	2	1	1	4	6	0	15000	180000	4	4	0	3	2	1	2	1	1	21211	0.658217	90	0.8
68	60 & Above	1	2	2	1	6	6	0	60000	720000	6	3	0	3	1	1	2	2	2	11222	0.669243	70	0.8
28	16-30	2	2	1	1	2	6	0	12000	144000	9	2	2	3	1	1	2	2	2	11222	0.669243	90	0.8
35	31-45	2	2	1	1	6	7	20000	45000	540000	6	3	1	3	1	1	2	2	1	11221	0.700936	82	0.9
47	46-59	1	2	2	2	2	1	8000	8000	96000	6	5	0	3	1	1	2	2	1	11221	0.700936	85	0.8
26	16-30	1	1	1	1	5	7	20000	30000	360000	4	3	0	3	1	1	2	2	1	11221	0.700936	70	0.8
55	46-59	2	2	1	1	4	6	0	35000	420000	4	3	0	3	1	1	2	2	1	11221	0.700936	90	0.8
36	31-45	2	2	1	1	4	6	0	8000	96000	5	3	0	3	1	1	1	2	2	11122	0.723229	80	0.9
43	31-45	2	2	2	2	1	6	0	3000	36000	4	2	0	3	1	1	1	2	2	11122	0.723229	75	0.7
46	46-59	2	2	2	1	2	6	0	8000	96000	4	4	0	3	1	1	1	2	2	11122	0.723229	60	0.8
40	31-45	2	2	1	1	4	6	0	8000	96000	6	3	1	3	1	1	1	2	2	11122	0.723229	80	0.8
34	31-45	2	2	1	1	5	7	12000	40000	480000	8	6	2	3	1	1	1	2	2	11122	0.723229	80	0.8
34	31-45	2	2	1	2	4	6	0	7000	84000	5	3	1	3	1	1	1	2	2	11122	0.723229	95	0.9
50	46-59	2	2	1	1	1	6	0	25000	300000	7	6	1	3	1	1	1	2	2	11122	0.723229	75	0.8
21	16-30	1	1	1	2	5	3	5000	10000	120000	5	5	0	3	1	1	1	2	2	11122	0.723229	70	0.8
52	46-59	1	2	1	2	1	6	0	15000	180000	3	11	4	3	1	1	1	2	2	11122	0.723229	75	0.9
36	31-45	1	2	2	1	7	7	16000	25000	300000	6	4	2	3	1	1	1	2	2	11122	0.723229	70	0.8
30	16-30	2	2	1	2	2	6	0	7000	84000	5	4	1	3	1	1	1	2	2	11122	0.723229	70	0.8
55	46-59	2	2	1	1	1	6	0	20000	240000	5	8	1	3	1	1	1	3	1	11131	0.726	95	0.7
40	31-45	2	2	2	1	1	6	0	30000	360000	5	7	2	3	1	1	1	3	1	11131	0.726	90	0.8
46	46-59	1	2	1	2	2	6	0	7000	84000	4	4	0	3	1	1	2	1	2	11212	0.733538	80	0.8
32	31-45	2	2	1	1	3	6	0	12000	144000	6	4	2	3	1	1	2	1	2	11212	0.733538	75	0.9
58	46-59	2	2	1	1	4	6	0	16000	192000	4	4	0	3	1	1	2	1	2	11212	0.733538	70	0.9
40	31-45	2	2	2	1	6	6	0	11000	132000	9	8	1	3	2	1	1	1	1	21111	0.734283	80	0.9
37	31-45	2	2	1	2	3	6	0	5000	60000	5	5	0	3	2	1	1	1	1	21111	0.734283	90	0.8
48	46-59	2	2	1	1	2	6	0	10000	120000	3	3	0	3	1	1	3	1	1	11311	0.739	65	0.8
42	31-45	1	2	1	1	3	6	0	4500	54000	5	3	0	3	1	1	1	1	3	11113	0.766	85	0.9
19	16-30	1	1	1	2	5	7	12000	25000	300000	5	5	0	3	1	1	1	2	1	11121	0.78049	80	0.8
40	31-45	2	2	1	2	5	6	0	30000	360000	6	5	1	3	1	1	1	2	1	11121	0.78049	80	0.7
47	46-59	1	2	1	1	1	7	5000	10000	120000	8	5	2	3	1	1	1	2	1	11121	0.78049	70	0.9
42	31-45	1	2	3	2	2	7	0	6000	72000	4	4	0	3	1	1	1	2	1	11121	0.78049	80	0.8
17	16-30	2	1	2	2	5	6	0	20000	240000	6	6	0	3	1	1	1	2	1	11121	0.78049	80	0.9
60	60 & above	2	2	1	2	1	2	0	6500	78000	6	4	2	3	1	1	1	2	1	11121	0.78049	75	0.9
19	16-30	2	1	1	3	6	6	0	12000	144000	3	6	0	3	1	1	1	2	1	11121	0.78049	90	0.8
39	31-45	1	2	1	2	4	7	0	120000	1440000	6	5	1	3	1	1	1	2	1	11121	0.78049	75	0.9
40	31-45	2	2	2	2	2	6	0	8000	96000	4	4	0	3	1	1	1	2	1	11121	0.78049	85	0.8
35	31-45	1	2	1	1	4	7	7000	18000	216000	6	6	0	3	1	1	1	2	1	11121	0.78049	95	0.9
32	31-45	2	2	2	2	1	6	0	20000	240000	7	5	2	3	1	1	1	2	1	11121	0.78049	75	0.8
77	60 & Above	1	2	2	2	1	10	0	10000	120000	4	5	1	3	1	1	1	2	1	11121	0.78049	80	0.8
57	46-59	2	2	2	2	3	6	0	10000	120000	6	5	1	3	1	1	1	2	1	11121	0.78049	90	0.9
48	46-59	2	2	2	1	1	6	0	30000	360000	4	4	0	3	1	1	1	2	1	11121	0.78049	80	0.9
52	46-59	1	2	1	2	6	6	35000	35000	420000	5	4	1	3	1	1	1	2	1	11121	0.78049	88	0.9
45	31-45	2	2	1	1	3	6	0	20000	240000	4	4	0	3	1	1	1	2	1	11121	0.78049	90	0.8
70	60 & Above	2	2	1	2	2	6	0	7000	84000	2	2	0	3	1	1	1	2	1	11121	0.78049	90	0.8
24	16-30	1	1	2	2	4	8	0	7500	90000	5	4	0	3	1	1	1	2	1	11121	0.78049	98	0.9
40	31-45	2	2	1	2	4	6	0	10000	120000	4	5	0	3	1	1	2	1	1	11211	0.79063	40	0.9
23	16-30	2	1	1	1	5	7	9000	20000	240000	5	5	0	3	1	1	2	1	1	11211	0.79063	85	0.9
65	60 & Above	1	2	2	2	4	9	15000	25000	300000	5	4	1	3	1	1	2	1	1	11211	0.79063	80	0.9
43	31-45	1	2	2	1	4	4	50000	90000	1080000	4	4	0	3	1	1	1	1	2	11112	0.814345	80	0.8
45	31-45	2	2	2	1	1	6	0	5000	60000	2	4	0	3	1	1	1	1	2	11112	0.814345	85	0.9
26	16-30	1	1	1	2	4	3	0	16000	192000	8	6	1	3	1	1	1	1	2	11112	0.814345	80	0.8
36	31-45	1	2	1	1	3	3	6000	12000	144000	3	3	0	3	1	1	1	1	2	11112	0.814345	85	0.7
47	46-59	2	2	2	2	2	6	0	10000	120000	4	4	0	3	1	1	1	1	2	11112	0.814345	60	0.9
50	46-59	2	2	1	1	2	6	0	35000	420000	4	4	0	3	1	1	1	1	2	11112	0.814345	75	0.8
46	46-59	2	2	1	2	4	6	0	10000	120000	4	3	0	3	1	1	1	1	2	11112	0.814345	85	0.8
29	16-30	2	2	1	1	3	6	0	20000	240000	6	2	2	3	1	1	1	1	2	11112	0.814345	50	0.8
35	31-45	2	2	1	1	7	7	40000	60000	720000	4	2	2	3	1	1	1	1	1	11111	1	85	0.8
35	31-45	2	2	2	1	4	6	0	5000	60000	4	6	2	3	1	1	1	1	1	11111	1	95	0.9
38	31-45	2	2	1	1	2	6	0	20000	240000	3	5	2	3	1	1	1	1	1	11111	1	90	0.9
21	16-30	2	1	1	1	5	6	0	10000	120000	7	7	0	3	1	1	1	1	1	11111	1	80	0.8
23	16-30	2	2	1	1	2	6	0	6000	72000	7	2	1	3	1	1	1	1	1	11111	1	80	0.9
37	31-45	2	2	1	1	4	6	0	8000	96000	6	6	1	3	1	1	1	1	1	11111	1	70	0.8
40	31-45	2	3	2	2	6	7	8000	18000	216000	5	1	6	3	1	1	1	1	1	11111	1	80	0.8
48	46-59	2	2	2	1	1	6	0	20000	240000	4	6	0	3	1	1	1	1	1	11111	1	90	0.9
21	16-30	1	1	1	2	3	7	0	20000	240000	5	4	0	3	1	1	1	1	1	11111	1	90	0.9
56	46-59	2	2	2	1	2	6	0	50000	600000	4	4	2	3	1	1	1	1	1	11111	1	95	0.9
35	31-45	2	2	1	1	7	6	0	20000	240000	4	3	1	3	1	1	1	1	1	11111	1	95	0.9
21	16-30	1	1	1	1	5	4	10000	35000	420000	5	4	0	3	1	1	1	1	1	11111	1	70	0.7
39	31-45	1	2	1	1	1	4	6000	6000	72000	4	3	0	3	1	1	1	1	1	11111	1	75	0.9
52	46-59	2	2	1	1	1	6	0	8000	96000	6	5	0	3	1	1	1	1	1	11111	1	40	0.9
46	46-59	2	2	1	1	1	6	0	15000	180000	2	6	0	3	1	1	1	1	1	11111	1	85	0.9
52	46-59	2	2	1	1	1	6	0	35000	420000	6	4	2	3	1	1	1	1	1	11111	1	60	0.9
45	31-45	1	2	1	1	5	7	8000	8000	96000	2	8	0	3	1	1	1	1	1	11111	1	80	0.8
40	31-45	2	2	1	1	1	6	0	15000	180000	5	4	0	3	1	1	1	1	1	11111	1	90	0.9
37	31-45	2	2	2	2	4	6	0	8000	96000	5	4	0	3	1	1	1	1	1	11111	1	85	0.8
45	31-45	2	2	3	3	1	6	0	8000	96000	5	5	0	3	1	1	1	1	1	11111	1	90	0.9
34	31-45	2	2	1	2	6	6	0	25000	300000	4	12	1	3	1	1	1	1	1	11111	1	100	0.7
46	46-59	1	2	1	2	3	7	0	8500	102000	5	4	0	3	1	1	1	1	1	11111	1	90	0.9
37	31-45	1	2	1	2	3	7	8000	10000	120000	6	7	1	3	1	1	1	1	1	11111	1	90	0.9
36	31-45	2	2	2	2	2	6	0	7500	90000	4	5	0	3	1	1	1	1	1	11111	1	95	0.9
42	31-45	2	1	2	2	2	6	0	15000	180000	7	9	3	3	1	1	1	1	1	11111	1	70	0.8
54	46-59	2	2	2	1	5	7	57000	80000	960000	4	4	0	3	1	1	1	1	1	11111	1	80	0.9
61	60 & Above	2	2	2	2	1	6	0	30000	360000	9	8	1	3	1	1	1	1	1	11111	1	75	0.8
50	46-59	1	2	2	1	5	3	15000	4500	54000	5	5	0	3	1	1	1	1	1	11111	1	80	0.9
13	0-15	2	1	2	2	3	6	0	6000	72000	6	4	2	3	1	1	1	1	1	11111	1	80	0.8
52	46-59	1	2	2	1	5	2	20000	35000	420000	14	5	1	3	1	1	1	1	1	11111	1	80	0.8
60	60 & above	2	2	1	1	1	4	2000	12000	144000	6	6	1	3	1	1	1	1	1	11111	1	80	0.8
42	31-45	1	2	2	2	5	12	2500	2500	30000	4	4	0	3	1	1	1	1	1	11111	1	80	0.8
56	46-59	1	2	2	1	4	4	3000	15000	180000	5	5	1	3	1	1	1	1	1	11111	1	80	0.8
45	31-45	2	2	1	2	2	6	0	20000	240000	6	9	2	3	1	1	1	1	1	11111	1	80	0.8
51	46-59	2	2	2	2	2	6	0	35000	420000	10	4	0	3	1	1	1	1	1	11111	1	80	0.8
50	46-59	2	2	2	2	4	6	0	50000	600000	4	3	0	3	1	1	1	1	1	11111	1	80	0.8
68	60 & Above	1	2	2	1	7	9	20000	30000	360000	5	5	0	3	1	1	1	1	1	11111	1	80	0.8
45	31-45	1	2	2	1	7	7	18000	18000	216000	6	5	1	3	1	1	1	1	1	11111	1	80	0.8
56	46-59	2	2	1	1	1	6	0	30000	360000	8	3	0	3	1	1	1	1	1	11111	1	80	0.8
23	16-30	2	2	1	2	5	6	0	30000	360000	7	5	2	3	1	1	1	1	1	11111	1	80	0.8
43	31-45	2	2	1	2	2	6	0	30000	360000	6	6	0	3	1	1	1	1	1	11111	1	80	0.8
60	60 & above	2	2	2	2	1	6	0	10000	120000	9	5	4	3	1	1	1	1	1	11111	1	80	0.8
40	31-45	2	2	1	1	1	6	0	9000	108000	4	3	1	3	1	1	1	1	1	11111	1	80	0.8
50	46-59	2	2	1	1	5	6	0	15000	180000	3	3	0	3	1	1	1	1	1	11111	1	80	0.8
48	46-59	2	1	1	1	2	6	0	15000	180000	19	6	0	3	1	1	1	1	1	11111	1	80	0.8
28	16-30	2	2	1	2	4	6	0	12000	144000	4	2	2	3	1	1	1	1	1	11111	1	80	0.8
33	31-45	2	2	1	2	2	7	0	9000	108000	6	9	0	3	1	1	1	1	1	11111	1	80	0.8
67	60 & Above	2	2	2	1	4	9	10000	12000	144000	9	8	1	3	1	1	1	1	1	11111	1	80	0.8
31	31-45	2	2	1	1	3	6	0	6000	72000	4	3	1	3	1	1	1	1	1	11111	1	80	0.8
49	46-59	2	2	1	1	4	6	0	20000	240000	4	4	0	3	1	1	1	1	1	11111	1	80	0.8
43	31-45	2	2	1	1	3	6	0	18000	216000	7	9	0	3	1	1	1	1	1	11111	1	80	0.8
34	31-45	2	2	1	2	6	6	0	20000	240000	5	2	1	3	1	1	1	1	1	11111	1	80	0.8
43	31-45	2	2	1	1	1	7	8000	17000	204000	5	5	0	3	1	1	1	1	1	11111	1	80	0.8
30	16-30	2	2	1	1	3	6	0	8000	96000	6	2	2	3	1	1	1	1	1	11111	1	80	0.8
59	46-59	2	2	1	1	3	6	0	20000	240000	3	3	0	3	1	1	1	1	1	11111	1	80	0.8
31	31-45	2	2	1	1	7	6	0	25000	300000	4	4	0	3	1	1	1	1	1	11111	1	80	0.8
34	31-45	1	2	2	2	3	7	6000	6000	72000	4	3	1	3	1	1	1	1	1	11111	1	80	0.8
30	16-30	1	2	1	2	4	3	8000	8000	96000	7	4	3	3	1	1	1	1	1	11111	1	80	0.8
44	31-45	2	2	1	1	2	6	0	16000	192000	4	5	0	3	1	1	1	1	1	11111	1	80	0.8
34	31-45	2	2	1	1	2	6	0	5000	60000	4	3	1	3	1	1	1	1	1	11111	1	80	0.8
46	46-59	2	2	1	1	2	4	4500	4500	54000	3	3	0	3	1	1	1	1	1	11111	1	80	0.8
40	31-45	2	2	2	2	4	6	0	10000	120000	7	5	0	3	1	1	1	1	1	11111	1	80	0.8
49	46-59	2	2	2	2	3	6	0	20000	240000	7	6	1	3	1	1	1	1	1	11111	1	80	0.8
47	46-59	2	2	1	1	4	4	10000	30000	360000	4	4	0	3	1	1	1	1	1	11111	1	80	0.8
52	46-59	2	2	1	1	3	6	0	10000	120000	5	3	2	3	1	1	1	1	1	11111	1	80	0.8
